# Supplementary material for: The Effect of Antimicrobial Treatment upon the Gill Bacteriome of Atlantic Salmon (Salmo salar L.) and Progression of Amoebic Gill Disease (AGD) In Vivo
Source: MDPI journal article supplement (doi:10.3390/microorganisms9050987), 2021-05-02
Supplement: s1 [file s1]

**Supplementary:**

Table S1. Primer sequence and concentration for qPCR assay target genes, *Neoparamoeba perurans* and salmon elongation factor 1 alpha (ELF)

| Gene               | Primer  | Sequence (5'-3')               | Reaction Conc. (nM) | Amplicon Length (bp) | Reference |
|--------------------|---------|--------------------------------|---------------------|----------------------|-----------|
| <i>N. perurans</i> | Forward | AAAAGACCATGCGATTCGTAAAGT       | 300                 | 70                   | [1,3]     |
|                    | Reverse | CATTCTTTTCGGAGAGTGGAAATT       | 900                 |                      |           |
|                    | Probe   | 6FAM-ATCATGATTCACCATATGTT-MGB  | 200                 |                      |           |
| Efl $\alpha$       | Forward | GGCCAGATCTCCCAGGGCTAT          | 900                 | 66                   | [2]       |
|                    | Reverse | TGAACTTGCAGGCGATGTGA           | 900                 |                      |           |
|                    | Probe   | NED-CCTGTGCTGGATTGCCATACTG-MGB | 250                 |                      |           |

Table S2. Primer sequences for the 2-step PCR preparation for amplifying the V1-V3 region within the 16S rRNA gene

| Forward primer 5'-3' ("27F-adapt")  |                       |       |
|-------------------------------------|-----------------------|-------|
| Illumina overhang adapter           | 27F                   | Refs  |
| TCGTCGGCAGCGTCAGATGTGTATAAGAGACAG   | AGAGTTTGTATYMTGGCTCAG | [4,5] |
| Reverse primer 5'-3' ("519R-adapt") |                       |       |
| Illumina overhang adapter           | 519R                  | Refs  |
| GTCTCGTGGGCTCGGAGATGTGTATAAGAGACAG  | GWATTACCGCGGCKGCTG    | [6,7] |

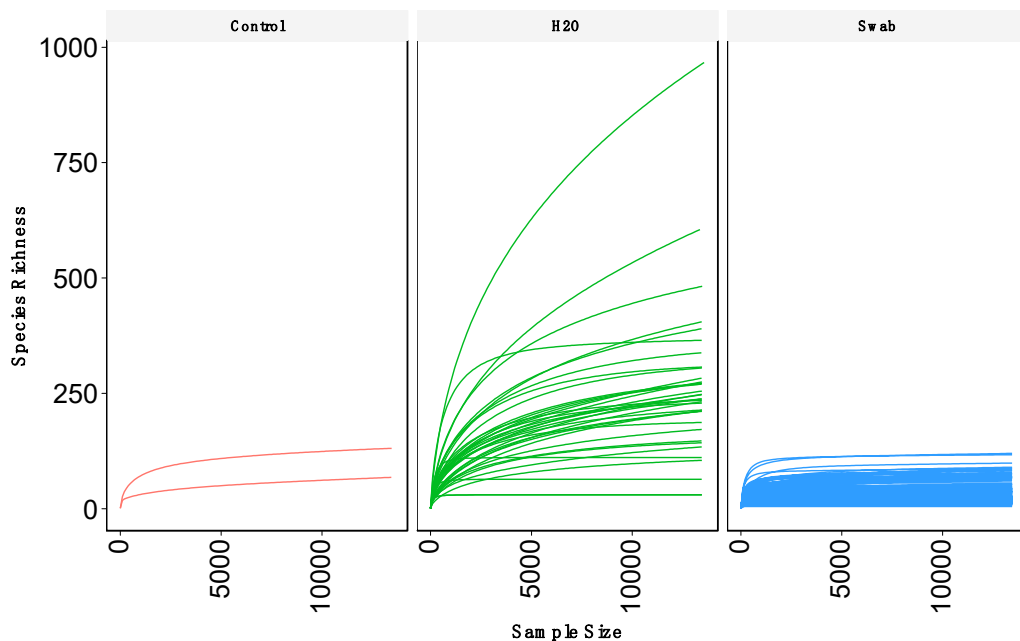

Figure S1. Alpha rarefaction curve from biological samples, depicting species richness (Observed ASVs) against sample size (sequence reads). Figure panels are faceted to sequencing controls, water samples and gill mucus swabs.

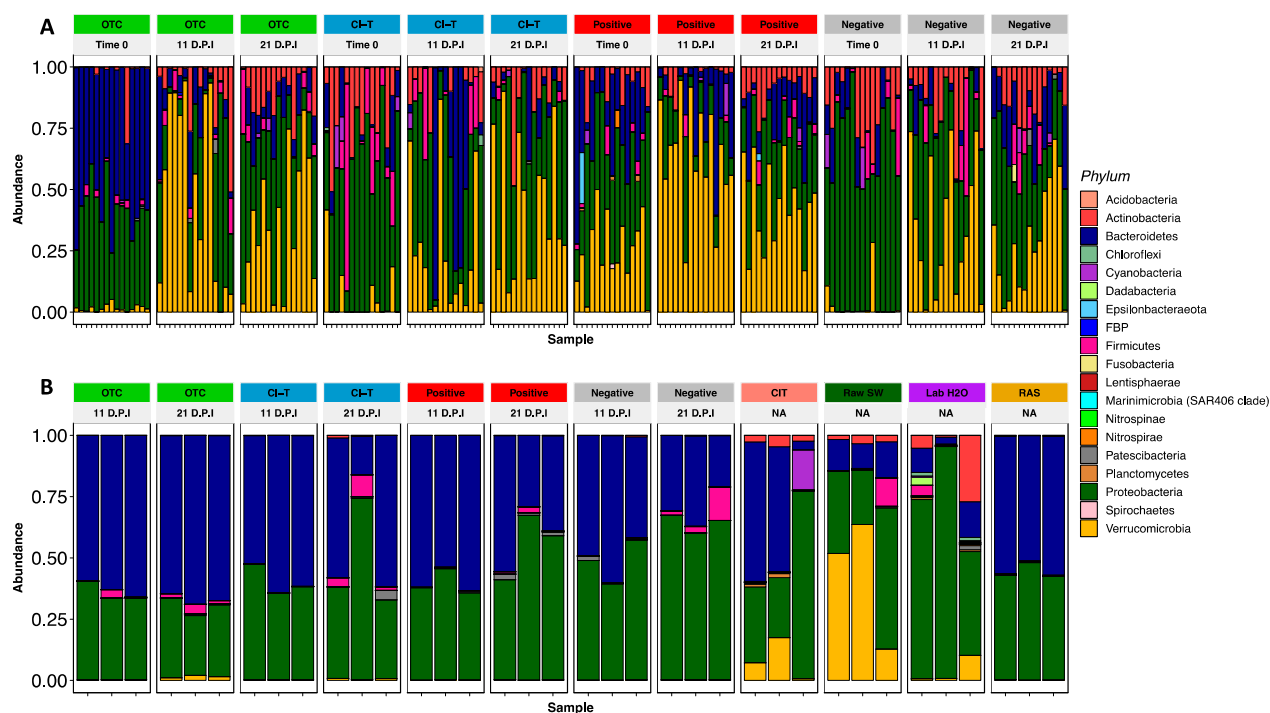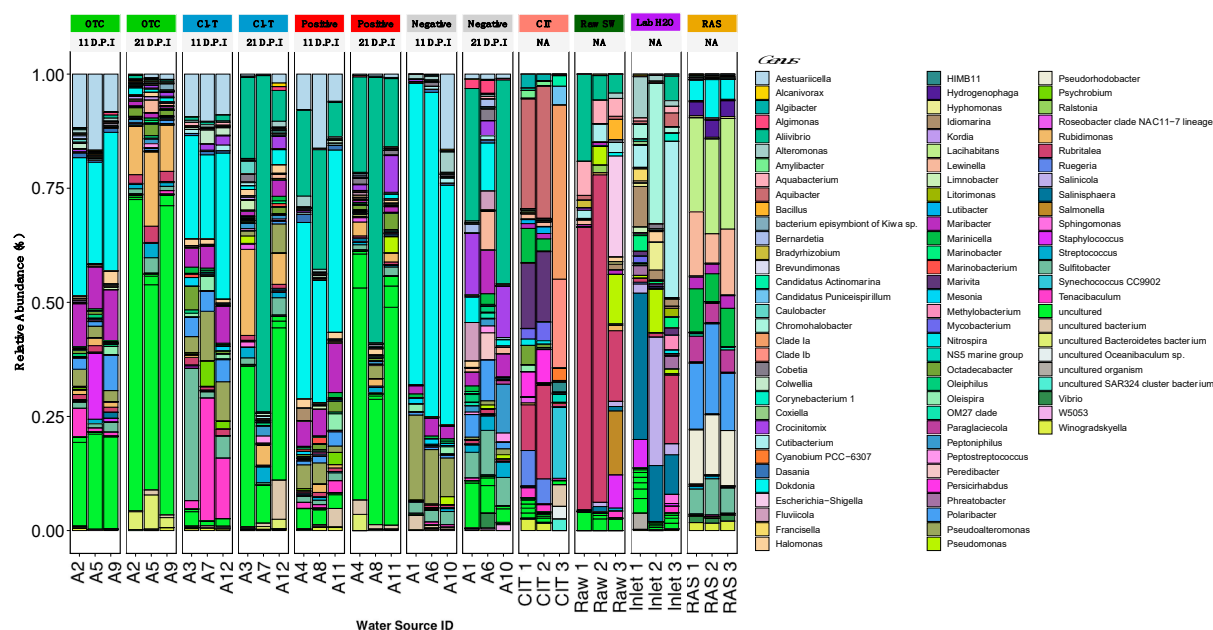

## References

2. Bruno, D.; Collet, B.; Turnbull, A.; Kilburn, R.; Walker, A.; Pendrey, D.; McIntosh, A.; Urquhart, K.; Taylor, G. Evaluation and development of diagnostic methods for *Renibacterium salmoninarum* causing bacterial kidney disease (BKD) in the UK. *Aquaculture* **2007**, *269*, 114–122.
3. Downes, J.K.; Rigby, M.L.; Taylor, R.S.; Maynard, B.T.; MacCarthy, E.; O'Connor, I.; Marcos-Lopez, M.; Rodger, H.D.; Collins, E.; Ruane, N.M.; et al. Evaluation of non-destructive molecular diagnostics for the detection of *Neoparamoeba perurans*. *Front. Mar. Sci.* **2017**, *4*, 61.
4. Lane, D.J.; Pace, B.; Olsen, G.J.; Stahl, D.A.; Sogin, M.L.; Pace, N.R. Rapid determination of 16S ribosomal RNA sequences for phylogenetic analyses. *Proc. Natl. Acad. Sci. USA* **1985**, *82*, 6955–6959.
5. Zheng, W.; Tsompana, M.; Ruscitto, A.; Sharma, A.; Genco, R.; Sun, Y.; Buck, M.J. An accurate and efficient experimental approach for characterization of the complex oral microbiota. *Microbiome* **2015**, *3*, 48.
6. Lane, D.J. *rRNA Sequencing*; John Wiley & Sons: Hoboken, NJ, USA, 1991.
7. O'Farrell, H.E.; Shaw, J.G.; Goh, F.; Bowman, R.V.; Fong, K.M.; Krause, L.; Yang, I.A. Potential clinical utility of multiple target quantitative polymerase chain reaction (qPCR) array to detect microbial pathogens in patients with chronic obstructive pulmonary disease (COPD). *J. Thorac. Dis.* **2019**, *11*, S2254–S2265.
